# Supplementary material for: Factors affecting the performance of professional nurses and midwives in health facilities in Lira District, Uganda: a mixed-methods study
Source: Research Square preprint supplement (doi:10.21203/rs.3.rs-8321436/v1), 2025-12-16
Supplement: Supplementary file 1 [file 65ebb0a866e226f58757c9d0.docx]

**Supplementary file S3.** Linear regression predicting Availability

| **Availability** | Coef. | | St.Err. | t-value | | p-value | [95% Conf | | Interval] | Sig |
| --- | --- | --- | --- | --- | --- | --- | --- | --- | --- | --- |
| Comp1 | -0.001 | | 0.005 | -0.27 | | 0.787 | -0.011 | | 0.008 |  |
| Comp2_ | 0.090 | | 0.007 | 12.37 | | 0.000 | 0.076 | | 0.105 | *** |
| Comp3_ | -0.006 | | 0.010 | -0.54 | | 0.590 | -0.026 | | 0.015 |  |
| Comp4_ | 0.131 | | 0.010 | 13.35 | | 0.000 | 0.112 | | 0.151 | *** |
| Comp5_ | -0.060 | | 0.012 | -4.86 | | 0.000 | -0.085 | | -0.036 | *** |
| Comp6__ | -0.020 | | 0.007 | -2.93 | | 0.004 | -0.034 | | -0.007 | *** |
| Constant | 0.159 | | 0.060 | 2.64 | | 0.009 | 0.040 | | 0.279 | *** |
|  | | | | | | | | | | |
| Mean dependent var | | 0.523 | | | SD dependent var | | | 0.136 | |
| R-squared | | 0.902 | | | Number of obs | | | 156.000 | |
| F-test | | 229.778 | | | Prob > F | | | 0.000 | |
| Akaike crit. (AIC) | | -529.764 | | | Bayesian crit. (BIC) | | | -508.415 | |
|  | | | | | | | | | | |
| **** p<0.01, ** p<0.05, * p<0.1* | | | | | | | | | |
