# Supplementary material for: Factors affecting the performance of professional nurses and midwives in health facilities in Lira District, Uganda: a mixed-methods study
Source: Research Square preprint supplement (doi:10.21203/rs.3.rs-8321436/v1), 2025-12-16
Supplement: Supplementary file 2 [file 6e5256684987568d55fae601.docx]

**Supplementary file S4.** Linear regression predicting Responsiveness

| **Responsiveness** | Coef. | | St.Err. | t-value | | p-value | [95% Conf | | Interval] | Sig |
| --- | --- | --- | --- | --- | --- | --- | --- | --- | --- | --- |
| Comp1 | -0.006 | | 0.003 | -1.83 | | 0.069 | -0.012 | | 0.000 | * |
| Comp2_ | 0.070 | | 0.005 | 15.46 | | 0.000 | 0.061 | | 0.079 | *** |
| Comp3_ | 0.002 | | 0.006 | 0.37 | | 0.714 | -0.010 | | 0.015 |  |
| Comp4_ | 0.139 | | 0.006 | 22.64 | | 0.000 | 0.127 | | 0.151 | *** |
| Comp5_ | -0.047 | | 0.008 | -6.06 | | 0.000 | -0.062 | | -0.032 | *** |
| Comp6__ | -0.009 | | 0.004 | -1.98 | | 0.050 | -0.017 | | 0.000 | * |
| Constant | 0.171 | | 0.038 | 4.54 | | 0.000 | 0.096 | | 0.245 | *** |
| Mean dependent var | | 0.595 | | | SD dependent var | | | 0.119 | |
| R-squared | | 0.951 | | | Number of obs | | | 156.000 | |
| F-test | | 477.970 | | | Prob > F | | | 0.000 | |
| Akaike crit. (AIC) | | -676.790 | | | Bayesian crit. (BIC) | | | -655.441 | |
|  | | | | | | | | | | |
| **** p<0.01, ** p<0.05, * p<0.1* | | | | | | | | | |
