# Supplementary material for: Factors affecting the performance of professional nurses and midwives in health facilities in Lira District, Uganda: a mixed-methods study
Source: Research Square preprint supplement (doi:10.21203/rs.3.rs-8321436/v1), 2025-12-16
Supplement: Supplementary file 3 [file ab2c72b5ee206d14aa78b7bb.docx]

**Supplementary file S1.** Linear regression predicting competencies

| **Competencies** | Coef. | | St.Err. | t-value | | p-value | [95% Conf | | Interval] | Sig |
| --- | --- | --- | --- | --- | --- | --- | --- | --- | --- | --- |
| Comp1 | -0.010 | | 0.004 | -2.53 | | 0.012 | -0.019 | | -0.002 | ** |
| Comp2_ | 0.066 | | 0.006 | 10.81 | | 0.000 | 0.054 | | 0.078 | *** |
| Comp3_ | 0.039 | | 0.009 | 4.52 | | 0.000 | 0.022 | | 0.057 | *** |
| Comp4_ | 0.080 | | 0.008 | 9.75 | | 0.000 | 0.064 | | 0.096 | *** |
| Comp5_ | -0.012 | | 0.010 | -1.16 | | 0.249 | -0.032 | | 0.008 |  |
| Comp6__ | -0.011 | | 0.006 | -1.98 | | 0.050 | -0.023 | | 0.000 | * |
| Constant | 0.203 | | 0.051 | 4.01 | | 0.000 | 0.103 | | 0.302 | *** |
|  | | | | | | | | | | |
| Mean dependent var | | 0.605 | | | SD dependent var | | | 0.087 | |
| R-squared | | 0.835 | | | Number of obs | | | 156.000 | |
| F-test | | 125.330 | | | Prob > F | | | 0.000 | |
| Akaike crit. (AIC) | | -585.183 | | | Bayesian crit. (BIC) | | | -563.834 | |
|  | | | | | | | | | | |
| **** p<0.01, ** p<0.05, * p<0.1* | | | | | | | | | |
