# Supplementary material for: Factors affecting the performance of professional nurses and midwives in health facilities in Lira District, Uganda: a mixed-methods study
Source: Research Square preprint supplement (doi:10.21203/rs.3.rs-8321436/v1), 2025-12-16
Supplement: Supplementary file 4 [file ab6db7ae7b452afc398987c3.docx]

**Supplementary file S2.** Linear regression predicting productivity

| **Productivity** | Coef. | | St.Err. | t-value | | p-value | [95% Conf | | Interval] | Sig |
| --- | --- | --- | --- | --- | --- | --- | --- | --- | --- | --- |
| Comp1 | -0.029 | | 0.007 | -4.00 | | 0.000 | -0.043 | | -0.014 | *** |
| Comp2_ | 0.030 | | 0.011 | 2.80 | | 0.006 | 0.009 | | 0.051 | *** |
| Comp3_ | 0.044 | | 0.015 | 2.88 | | 0.005 | 0.014 | | 0.074 | *** |
| Comp4_ | 0.131 | | 0.014 | 9.14 | | 0.000 | 0.103 | | 0.159 | *** |
| Comp5_ | -0.025 | | 0.018 | -1.38 | | 0.171 | -0.061 | | 0.011 |  |
| Comp6__ | -0.003 | | 0.010 | -0.33 | | 0.740 | -0.023 | | 0.017 |  |
| Constant | 0.179 | | 0.088 | 2.04 | | 0.044 | 0.005 | | 0.353 | ** |
|  | | | | | | | | | | |
| Mean dependent var | | 0.601 | | | SD dependent var | | | 0.093 | |
| R-squared | | 0.559 | | | Number of obs | | | 156.000 | |
| F-test | | 31.419 | | | Prob > F | | | 0.000 | |
| Akaike crit. (AIC) | | -411.689 | | | Bayesian crit. (BIC) | | | -390.340 | |
|  | | | | | | | | | | |
| **** p<0.01, ** p<0.05, * p<0.1* | | | | | | | | | |
