# Supplementary material for: Factors affecting the performance of professional nurses and midwives in health facilities in Lira District, Uganda: a mixed-methods study
Source: Research Square preprint supplement (doi:10.21203/rs.3.rs-8321436/v1), 2025-12-16
Supplement: Supplementary file 5 [file ec9c8c5222d9ed2169cf837a.docx]

**Supplementary file S5.** Linear regression predicting performance of professional nurses& midwives

| **Performance** | Coef. | | St.Err. | t-value | | p-value | [95% Conf | | Interval] | Sig |
| --- | --- | --- | --- | --- | --- | --- | --- | --- | --- | --- |
| Comp1 | -0.011 | | 0.004 | -2.81 | | 0.006 | -0.020 | | -0.003 | *** |
| Comp2_ | 0.064 | | 0.006 | 10.56 | | 0.000 | 0.052 | | 0.076 | *** |
| Comp3_ | 0.020 | | 0.009 | 2.30 | | 0.023 | 0.003 | | 0.037 | ** |
| Comp4_ | 0.120 | | 0.008 | 14.71 | | 0.000 | 0.104 | | 0.136 | *** |
| Comp5_ | -0.036 | | 0.010 | -3.49 | | 0.001 | -0.056 | | -0.016 | *** |
| Comp6__ | -0.011 | | 0.006 | -1.89 | | 0.060 | -0.022 | | 0.000 | * |
| Constant | 0.178 | | 0.050 | 3.54 | | 0.001 | 0.079 | | 0.277 | *** |
| Mean dependent var | | 0.581 | | | SD dependent var | | | 0.103 | |
| R-squared | | 0.882 | | | Number of obs | | | 156.000 | |
| F-test | | 185.073 | | | Prob > F | | | 0.000 | |
| Akaike crit. (AIC) | | -586.928 | | | Bayesian crit. (BIC) | | | -565.579 | |
|  | | | | | | | | | | |
| **** p<0.01, ** p<0.05, * p<0.1* | | | | | | | | | |
